# Supplementary material for: Measures for Identifying Malnutrition in Geriatric Rehabilitation: A Scoping Review
Source: MDPI journal article supplement (doi:10.3390/nu16020223), 2024-01-10
Supplement: s1 [file s1]

**Table S1.** Inclusion and exclusion criteria for the literature search.

|                                      | Inclusion criteria                                                                                                                                                                                                 | Exclusion criteria                                                                                                              |
|--------------------------------------|--------------------------------------------------------------------------------------------------------------------------------------------------------------------------------------------------------------------|---------------------------------------------------------------------------------------------------------------------------------|
| Language                             | English                                                                                                                                                                                                            | Non-English                                                                                                                     |
| Publication date                     | From January 1, 1980 to September 30 2023                                                                                                                                                                          | Before 1980                                                                                                                     |
| Population                           | Older adults (mean age 65 years or over) undergoing rehabilitation                                                                                                                                                 | Individuals aged less than 65 years, no rehabilitation provided                                                                 |
| Setting                              | Rehabilitation hospital, rehabilitation unit/ ward, rehabilitation facility, post-acute care unit/ward, convalescent rehab ward                                                                                    | Acute care hospital, long-term care hospital, long-term care facility, community                                                |
| Definition of nutritional assessment | Containing both static measurement of body weight/ body composition and body weight change                                                                                                                         | Not containing either static measurement of body weight/ body composition and body weight change                                |
| Study design                         | Cross-sectional study, cohort study, case-control study<br>intervention study (only used to look for nutritional assessment tools used)<br>The studies in systematic reviews and meta-analysis were also included. | Conference abstracts, conference papers, qualitative studies, study protocols, commentaries, editorials, and narrative reviews. |

**Table S2.** Search terms for MEDLINE and CINAHL

| MEDLINE |                                                                                                                                                                                                                                                                                |        |
|---------|--------------------------------------------------------------------------------------------------------------------------------------------------------------------------------------------------------------------------------------------------------------------------------|--------|
|         | Search terms                                                                                                                                                                                                                                                                   | Hits   |
| #1      | exp Malnutrition/ OR (malnutrition OR malnourished OR undernutrition OR undernourished OR "under nutrition" OR "decreased nutritional status" OR "nutritional disorder" OR "nutritional deterioration" OR "protein energy malnutrition" OR "protein calorie malnutrition").mp. | 178031 |
| #2      | ("rehabilitation unit*" OR "rehabilitation ward*" OR "rehabilitation hospital*" OR "geriatric ward*" OR "post-acute" OR "rehabilitation facilit*" OR "geriatric facilit*" OR "geriatric rehabilitation").mp.                                                                   | 20101  |
| #3      | #1 AND #2                                                                                                                                                                                                                                                                      | 418    |
| #4      | limit 3 to (english language and yr="1980 - 2023" and "all aged (65 and over)")                                                                                                                                                                                                | 245    |
| CINAHL  |                                                                                                                                                                                                                                                                                |        |
|         | Search terms                                                                                                                                                                                                                                                                   | Hits   |
| #1      | (MH Malnutrition+) OR (malnutrition OR malnourished OR undernutrition OR undernourished OR "under nutrition" OR "decreased nutritional status" OR "nutritional disorder" OR "nutritional deterioration" OR "protein energy malnutrition" OR "protein calorie malnutrition")    | 27722  |
| #2      | ("rehabilitation unit*" OR "rehabilitation ward*" OR "rehabilitation hospital*" OR "geriatric ward*" OR "post-acute" OR "rehabilitation facilit*" OR "geriatric facilit*" OR "geriatric rehabilitation")                                                                       | 14327  |
| #3      | S1 AND S2                                                                                                                                                                                                                                                                      | 200    |
| #4      | Limiters - Published Date: 19800101-20230930; English Language; Age Groups: Aged: 65+ years                                                                                                                                                                                    | 117    |

**Table S3.** Summary of 56 studies included in this scoping review

| 1 <sup>st</sup> author, publication year | Country   | N                | Design                   | Measures for identifying malnutrition <sup>a</sup>       | Concurrent validity        | Outcome measures for predictive validity | Potential confounders adjusted in statistical analysis |
|------------------------------------------|-----------|------------------|--------------------------|----------------------------------------------------------|----------------------------|------------------------------------------|--------------------------------------------------------|
| Andersson, 2002 (21)                     | Sweden    | 223              | Cross-sectional          | SGA                                                      | -                          | Oral health problems (e.g., voice, lips) | -                                                      |
| Avenell, 2016 (22)                       | Diverse   | 3881/ 41 studies | MA                       | Unspecified                                              | -                          | -                                        | -                                                      |
| Babineau, 2008 (23)                      | Canada    | 62               | Quasi-experimental study | (1) BMI and serum albumin, or<br>(2) BMI and weight loss | -                          | -                                        | -                                                      |
| Bellelli, 2012 (24)                      | Italy     | 502              | Cohort                   | MNA                                                      | -                          | Complications                            | -                                                      |
| Bouillanne, 2013 (25)                    | France    | 66               | Intervention             | MNA                                                      | -                          | -                                        | -                                                      |
| Bouillanne, 2014 (26)                    | France    | 66               | Intervention             | MNA-SF                                                   | -                          | -                                        | -                                                      |
| Charlton, 2010 (27)                      | Australia | 2076             | Cross-sectional          | MNA, MNA-SFver2                                          | (MNA-SF) Se:89%<br>Sp: 44% | Body weight                              | -                                                      |

|                         |              |     |                 |             |   |                                                                   |                                                                                     |
|-------------------------|--------------|-----|-----------------|-------------|---|-------------------------------------------------------------------|-------------------------------------------------------------------------------------|
| Clark, 2020 (28)        | Australia    | 444 | Cross-sectional | GLIM, ESPEN | - | -                                                                 | -                                                                                   |
| Duerksen, 2000 (29)     | Canada       | 87  | Cohort          | SGA         | - | Mortality<br>Re-hospitalization<br>Length of institutionalization | -                                                                                   |
| Frangos, 2016 (30)      | Switzerland  | 392 | Cross-sectional | MNA-SF      | - | -                                                                 | -                                                                                   |
| Groenendijk, 2020 (31)  | Netherlands  | 40  | Cross-sectional | MNA         | - | -                                                                 | -                                                                                   |
| Hettiarachchi, 2021 (6) | Australia    | 618 | Cohort          | GLIM, ESPEN | - | ADL<br>IADL                                                       | Age, CCI, cognitive impairment                                                      |
| Lelli, 2019 (32)        | Italy, Spain | 415 | Cohort          | MNA-SF      | - | ADL                                                               | Age, sex, MMSE, CCI, LOS, BI at admission, diagnosis                                |
| Maeda, 2018 (33)        | Japan        | 207 | Cohort          | ESPEN       | - | ADL                                                               | Age, sex, LOS in the acute ward, CCI, premorbid BI, LOS in the post-acute care ward |
| Malafarina, 2019 (34)   | Spain        | 187 | Cohort          | MNA-SF      | - | Sarcopenia                                                        | Age, sex, research cites                                                            |

|                      |           |     |                 |                                                    |                                                                                        |                                           |                                                                                                |
|----------------------|-----------|-----|-----------------|----------------------------------------------------|----------------------------------------------------------------------------------------|-------------------------------------------|------------------------------------------------------------------------------------------------|
| Marshall, 2016a (13) | Australia | 57  | Cohort          | MNA, scored PG-SGA, ICD-10-Australian modification | (MNA) Se: 58% Sp: 97% (PG-SGA rating)) Se: 100% Sp: 87% (PG-SGA score) Se: 92% Sp: 84% | LOS Admission to RACF Discharging to home | -                                                                                              |
| Marshall, 2016b (35) | Australia | 57  | Cohort          | MNA-SF, ICD-10-Australian modification             | (MNA-SF) Se: 100% Sp: 23%                                                              | Re-hospitalization                        | -                                                                                              |
| Nishioka, 2016a (36) | Japan     | 178 | Cross-sectional | MNA-SF                                             | -                                                                                      | ADL                                       | Age, sex, LOS, days from onset to admission, FIM on admission, lower-order items of the MNA-SF |
| Nishioka, 2016b (37) | Japan     | 897 | Cohort          | MNA-SF                                             | -                                                                                      | -                                         | -                                                                                              |
| Nishioka, 2018 (38)  | Japan     | 110 | Cross-sectional | MNA-SF                                             | -                                                                                      | ADL                                       | Age, sex, pre-stroke certification for LTCI,                                                   |

|                      |       |     |              |               |                                      |                                                                                                |                                                                                           |
|----------------------|-------|-----|--------------|---------------|--------------------------------------|------------------------------------------------------------------------------------------------|-------------------------------------------------------------------------------------------|
|                      |       |     |              |               |                                      |                                                                                                | FIM admission, CCI, days from fracture to admission                                       |
| Nishioka, 2020a (7)  | Japan | 420 | Cohort       | ESPEN, MNA-SF | MUST, (MNA-SF) Se: 78-96% Sp: 57-85% | ADL Discharge to home Discharge to LTCF Re-admission (The effect of the MUST was not analyzed) | Age, sex, onset-duration, stroke type, dysphagia, dyslipidemia, pre-stroke ADL, FIM       |
| Nishioka, 2020b (39) | Japan | 113 | Case-control | ESPEN, MNA-SF | -                                    | Swallowing ability (The effect of the MNA-SF was not analyzed)                                 | Age, gender, FILS on admission, FIM on admission                                          |
| Nishioka, 2021a (8)  | Japan | 489 | Cohort       | MNA-SF        | -                                    | ADL Discharging to home                                                                        | Age, sex, CCI, onset duration, need of care before onset, FILS, daily rehabilitation dose |

|                      |           |     |                            |              |   |                                            |                                                                                                                                                                       |
|----------------------|-----------|-----|----------------------------|--------------|---|--------------------------------------------|-----------------------------------------------------------------------------------------------------------------------------------------------------------------------|
| Nishioka, 2021b (40) | Japan     | 531 | Cross-sectional            | GLIM, MUST   | - | -                                          | -                                                                                                                                                                     |
| Nomoto, 2022 (41)    | Japan     | 160 | Cross-sectional            | GLIM, MNA-SF | - | -                                          | -                                                                                                                                                                     |
| O'Leary, 2011 (42)   | Australia | 52  | Cross-sectional            | MNA          | - | LOS                                        | Age, sex                                                                                                                                                              |
| Ogawa, 2022 (43)     | Japan     | 807 | Cohort/<br>Cross-sectional | MNA-SF       | - | Body composition                           | Age, sex, BMI on admission, SMI on admission, CCI, length from onset to transfer to the hospital, fracture types, length of hospital stay, period of exercise therapy |
| Roger, 2021 (44)     | Australia | 145 | Cohort                     | GLIM         | - | Physical performance<br>Sedentary behavior | Age, sex, comorbidity                                                                                                                                                 |
| Sakai, 2017 (45)     | Japan     | 174 | Cross-sectional            | MNA-SF       | - | Tongue pressure                            | Age, complete denture, BI, serum albumin, CONUT score, BMI, handgrip strength, CC,                                                                                    |

arm muscle area.

|                              |       |     |                 |              |          |                                                                                           |                                                        |
|------------------------------|-------|-----|-----------------|--------------|----------|-------------------------------------------------------------------------------------------|--------------------------------------------------------|
| Sánchez-Rodríguez, 2017 (46) | Spain | 88  | Cohort          | ESPEN        | -        | -                                                                                         | -                                                      |
| Savina, 2003 (47)            | Italy | 103 | Cross-sectional | MNA          | -        | -                                                                                         | -                                                      |
| Shimazu, 2021 (48)           | Japan | 454 | Cohort          | MNA-SF       | -        | -                                                                                         | -                                                      |
| Shimizu, 2018 (49)           | Japan | 188 | Cross-sectional | MNA-SF       | -        | Texture-modified diet                                                                     | Age, sex, primary disease, SMI, FIM                    |
| Shimizu, 2019 (50)           | Japan | 188 | Cohort          | GLIM, MNA-SF | -        | Texture-modified diet<br>(The effect of type of stroke, CCI, the MNA-SF was not analyzed) | Age, sex, IDDSI-FDS, LOS, history of stroke, OHAT, FIM |
| Shimizu, 2020 (51)           | Japan | 335 | Cross-sectional | GLIM, MNA-SF | ESPEN, - | -                                                                                         | -                                                      |
| Shimizu, 2021a (52)          | Japan | 129 | Cross-sectional | MNA-SF       | -        | -                                                                                         | -                                                      |



|                      |           |      |                            |              |                               |                                            |                                                                                     |
|----------------------|-----------|------|----------------------------|--------------|-------------------------------|--------------------------------------------|-------------------------------------------------------------------------------------|
| Shimizu, 2021b (53)  | Japan     | 208  | Cross-sectional            | GLIM         | -                             | Poor appetite                              | Age, sex, primary disease, days from stroke onset to rehabilitation, CCI, MMSE, FIM |
| Shimizu, 2021c (54)  | Japan     | 146  | Cohort/<br>Cross-sectional | GLIM         | -                             | Swallowing ability<br>Sarcopenic dysphagia | Age, sex, primary disease, CCI, MMSE, FIM, FILS, probable sarcopenic dysphagia      |
| Shimizu, 2021d (55)  | Japan     | 380  | Cross-sectional            | GLIM, MNA-SF | -                             | -                                          | -                                                                                   |
| Shiraishi, 2017 (56) | Japan     | 108  | Cohort                     | MNA-SF       | -                             | -                                          | -                                                                                   |
| Söderhamn, 2002 (57) | Sweden    | 114  | Cohort                     | MNA          | (MNA)<br>r=-0.74<br>(P<0.001) | -                                          | -                                                                                   |
| Tamamura, 2021 (58)  | Japan     | 155  | Cohort                     | MNA-SF       | -                             | ADL<br>Discharging to home                 | -                                                                                   |
| Tanaka, 2019 (59)    | Japan     | 154  | Cohort                     | SGA          | -                             | ADL                                        | Age, sex, ASIA, FIM                                                                 |
| Than, 2019 (60)      | Australia | 4487 | Cohort                     | MNA-SF       | -                             | Body weight                                | -                                                                                   |

|                            |               |              |                 |                                           |   |                                        |                                                                     |
|----------------------------|---------------|--------------|-----------------|-------------------------------------------|---|----------------------------------------|---------------------------------------------------------------------|
| Thiam, 2022 (61)           | Malaysia      | 73           | Cohort          | MNA-SF                                    | - | Mortality<br>ADL<br>Complications      | -                                                                   |
| Urquiza, 2020 (62)         | Spain         | 375          | Cohort          | MNA-SF                                    | - | Physical performance<br>ADL<br>Falling | Age-adjusted CCI, MMSE, SPPB, POMA, FAC (adjusted only for falling) |
| van Zwienen-Pot, 2017 (63) | Netherlands   | 245          | Cross-sectional | Combined methods with weight loss and BMI | - | -                                      | -                                                                   |
| van Zwienen-Pot, 2018 (64) | Netherlands   | 79           | Cross-sectional | Combined methods with weight loss and BMI | - | -                                      | -                                                                   |
| Verstraeten, 2021 (65)     | Australia     | 506          | Cohort          | GLIM                                      | - | -                                      | -                                                                   |
| Vivanti, 2011 (66)         | Australia     | 194          | Cohort          | SGA                                       | - | ADL<br>LOS<br>Falling                  | -                                                                   |
| Wester, 2018 (67)          | Australia     | 100          | Cohort          | SGA                                       | - | -                                      | -                                                                   |
| Wojzischke, 2020 (5)       | Multi-country | 19127/<br>62 | MA              | MNA                                       | - | ADL                                    | -                                                                   |

| studies                 |             |     |                 |                    |   |                                               |   |
|-------------------------|-------------|-----|-----------------|--------------------|---|-----------------------------------------------|---|
| Nijmeijer, 2023 (68)    | Netherland  | 291 | Cohort          | SNAQ <sup>RC</sup> | - | -                                             | - |
| Blanquet, 2023 (69)     | France      | 360 | Cross-sectional | GLIM               | - | Intake-requirement gap for energy and protein | - |
| Kayhan Kocak, 2023 (70) | Turkey      | 585 | Cross-sectional | MNA                | - | Re-hospitalization                            | - |
| Kurmann, 2023 (71)      | Switzerland | 203 | Intervention    | NRS2002            | - | -                                             | - |

ADL, activities of daily living; ASIA, American Spinal Injury Association; Impairment Scale; BI, Barthel Index; BMI, body mass index; BNP, brain natriuretic peptide; CC, calf circumference; CCI, Charlson Comorbidity Index; CONUT, CONTrolling NUTritional status; ESPEN, diagnostic criteria for malnutrition by the European Society for Clinical Nutrition and Metabolism; FAC, Functional Ambulation Category; FILS Food Intake LEVEL Scale; FIM, Functional Independence Measure; GLIM, Global Leadership Initiative for Malnutrition; GNRI, Geriatric Nutritional Risk Index; IADL, instrumental activities of daily living; ICD-10-AM, International Classification of Disease, 10<sup>th</sup> version, Australian modification; IDDSI-FDS, International Dysphagia Diet Standardization Initiative Functional Diet Scale; LOS, length of stay; LTCF, long-term care facilities; LTCI, long-term care insurance; MA, meta-analysis; MMSE, Mini Mental State Examination; MNA-SF, Mini Nutritional Assessment- Short Form; MNA, Mini Nutritional Assessment; MUST, Malnutrition Universal Screening Tool; NRS2002, Nutritional Risk Screening 2002; OHAT, Oral Health Assessment Tool; PG-SGA, patient-generated Subjective Global Assessment; POMA, Tinetti Performance-Oriented Mobility Assessment; RACF, residential aged-care facilities; Se, sensitivity; Sp, specificity; SGA, Subjective Global Assessment; SMI, skeletal muscle mass index; SNAQ<sup>RC</sup>, Short Nutritional Assessment Questionnaire for Residential Care; SPPB, Short Physical Performance Battery. <sup>a</sup>Measures for malnutrition not meeting pre-specified criteria (including both static body weight and weight change) were omitted from this table (e.g., Malnutrition Screening Tool)
